# Supplementary material for: Early Potent Protection against Heterologous SIVsmE660 Challenge Following Live Attenuated SIV Vaccination in Mauritian Cynomolgus Macaques
Source: PubMed Central journal article supplement (PMC3154277; doi:10.1371/journal.pone.0023092), 2011-08-10
Supplement: pone.0023092.s001.pdf [file pone.0023092.s001.pdf]

| Macaque     | Reciprocal<br>dilution SIV <sub>smE660</sub> | vRNA (log <sub>10</sub> )<br>SIV RNA c/ml |       | VI | Number<br>infected |
|-------------|----------------------------------------------|-------------------------------------------|-------|----|--------------------|
|             |                                              | Day                                       |       |    |                    |
|             |                                              | 10                                        | 14    |    |                    |
| <b>B1</b>   | 10                                           | 7.49                                      | 6.58  | +  | 2/2                |
| <b>B2</b>   | 10                                           | 7.39                                      | 6.29  | +  |                    |
| <b>B3</b>   | 100                                          | 7.60                                      | 6.82  | +  | 2/2                |
| <b>B4</b>   | 100                                          | 7.43                                      | 6.69  | +  |                    |
| <b>B5</b>   | 1,000                                        | 7.60                                      | 7.70  | +  | 2/2                |
| <b>B6</b>   | 1,000                                        | 7.31                                      | 6.30  | +  |                    |
| <b>B7</b>   | 10,000                                       | 5.72                                      | 7.15  | +  | 2/2                |
| <b>B8</b>   | 10,000                                       | 5.63                                      | 6.98  | +  |                    |
| <b>B95</b>  | 10,000                                       | nt                                        | 6.93  | +  | 2/2                |
| <b>B96</b>  | 10,000                                       | nt                                        | 7.03  | +  |                    |
| <b>B97</b>  | 100,000                                      | nt                                        | <1.30 | -  | 1/2                |
| <b>B98</b>  | 100,000                                      | nt                                        | 7.61  | +  |                    |
| <b>B99</b>  | 1,000,000                                    | nt                                        | <1.30 | -  | 0/2                |
| <b>B100</b> | 1,000,000                                    | nt                                        | <1.30 | -  |                    |
